# Supplementary material for: The bulk photovoltaic effect in the one-dimensional interface of graphene/BN superlattices
Source: Royal Society of Chemistry journal article supplement (doi:10.1039/d5cp03159a), 2025-01-01
Supplement: d5cp03159a1.pdf [file d5cp03159a1.pdf]

Supporting Information

The Bulk Photovoltaic Effect in the One-Dimensional Interface of  
Graphene/BN Superlattice

Yue Gao<sup>1</sup>, Wenli Zou<sup>1</sup>, Chunmei Zhang<sup>1,\*</sup>

<sup>1</sup>School of Physics, Northwest University, Xi'an 710127, China

\*Corresponding authors: C. Z.: [chunmeizhang@nwu.edu.cn](mailto:chunmeizhang@nwu.edu.cn)

Table 1. The lattice parameter  $b$  (Å), C-B, and C-N bond length (Å) at the interface of armchair graphene/BN SLs with different widths  $N$ . The B-N and C-C bond length change relative to that of the pristine graphene and BN (%).

| Chain (N) | Lattice parameter<br>$b$ (Å) | C-B<br>(Å) | C-N<br>(Å) | $\Delta(\text{B-N})/\text{B-N}_{\text{pri}}$ (%) | $\Delta(\text{C-C})/\text{C-C}_{\text{pri}}$ (%) |
|-----------|------------------------------|------------|------------|--------------------------------------------------|--------------------------------------------------|
| 1         | 4.321                        | 1.517      | 1.393      | -0.069                                           | 0.070                                            |
| 2         | 4.312                        | 1.517      | 1.403      | -0.207                                           | 0.491                                            |
| 3         | 4.312                        | 1.518      | 1.406      | -0.551                                           | 0.140                                            |
| 4         | 4.312                        | 1.516      | 1.406      | -0.620                                           | 0.140                                            |
| 5         | 4.310                        | 1.517      | 1.406      | -0.690                                           | 0.351                                            |
| 6         | 4.310                        | 1.517      | 1.407      | -0.690                                           | 0.280                                            |
| 7         | 4.319                        | 1.507      | 1.399      | -0.552                                           | 0.561                                            |
| 8         | 4.318                        | 1.506      | 1.398      | -1.103                                           | 0.632                                            |
| 9         | 4.319                        | 1.507      | 1.399      | -1.103                                           | 0.561                                            |

Table S2. The bandgap, bandgap type, and the first peak value of  $\sigma^{yyy}$  of graphene/BN SLs with different widths.

|                                  | Chain (N) | Band gap (eV) | Bandgap type | $\sigma^{yyy}$ ( $\mu\text{A}/\text{V}^2$ ) |
|----------------------------------|-----------|---------------|--------------|---------------------------------------------|
| $\text{C}_4\text{B}_2\text{N}_2$ | 1         | 1.136         | Direct       | 21.410                                      |
|                                  | 2         | 1.230         | Indirect     | 32.315                                      |
|                                  | 3         | 1.327         | Direct       | 15.627                                      |
|                                  | 4         | 0.579         | Direct       | 157.543                                     |

|             |   |       |          |         |
|-------------|---|-------|----------|---------|
|             | 5 | 0.658 | Direct   | 117.797 |
|             | 6 | 0.862 | Direct   | 30.568  |
|             | 7 | 0.455 | Direct   | 184.131 |
|             | 8 | 0.476 | Direct   | 143.431 |
|             | 9 | 0.651 | Direct   | 85.853  |
| $C_2B_3N_3$ | 1 | 1.991 | Indirect | 26.397  |
| $C_6B_1N_1$ | 1 | 1.046 | Direct   | 21.672  |

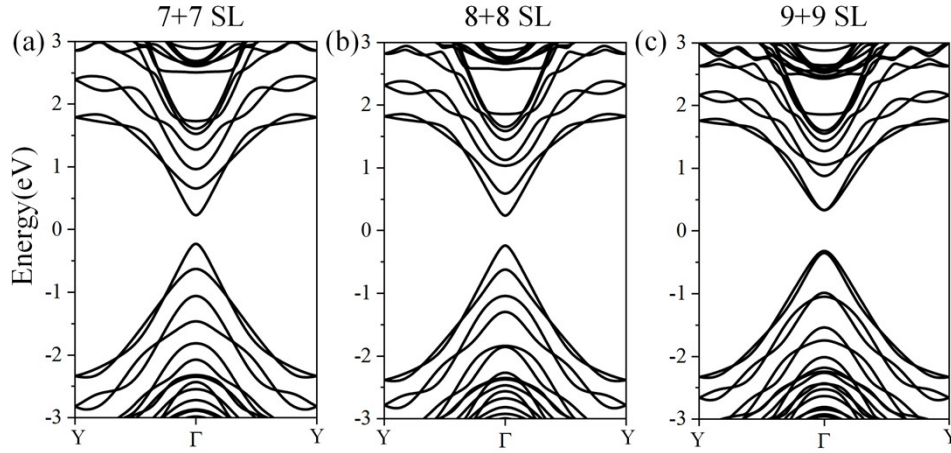

Figure S1 The electric band structure of the 7+7, 8+8, 9+9 SL. As the width  $N$  of the nanoribbon increases, the graphene/BN armchair SL can be regarded as one-dimensional materials, and the high-symmetry  $k$ -path transforms into  $Y-\Gamma-Y$ .

Figure S2 shows the orbital-resolved band structure of 1+1, 2+2, and 3+3 armchair SLs. For 3+3 armchair SL, the weight of C-, B-, and N- $p_z$  orbitals at the  $\Gamma$  point is significantly larger than that of other high-symmetry points, indicating a higher density of states at the  $\Gamma$  point. The relatively flat bands are seen at the  $\Gamma$  point due to electronic state condensation. In contrast, for 1+1 and 2+2 armchair SLs, the  $p_z$  is dominant near the K point. Furthermore, compared to the band structure of 1+1 and 2+2 armchair SLs, strong interactions between VBM and VB-2, as well as CBM and CB-2, are evident in the 3+3 case, further confirming the effect of BZ folding.

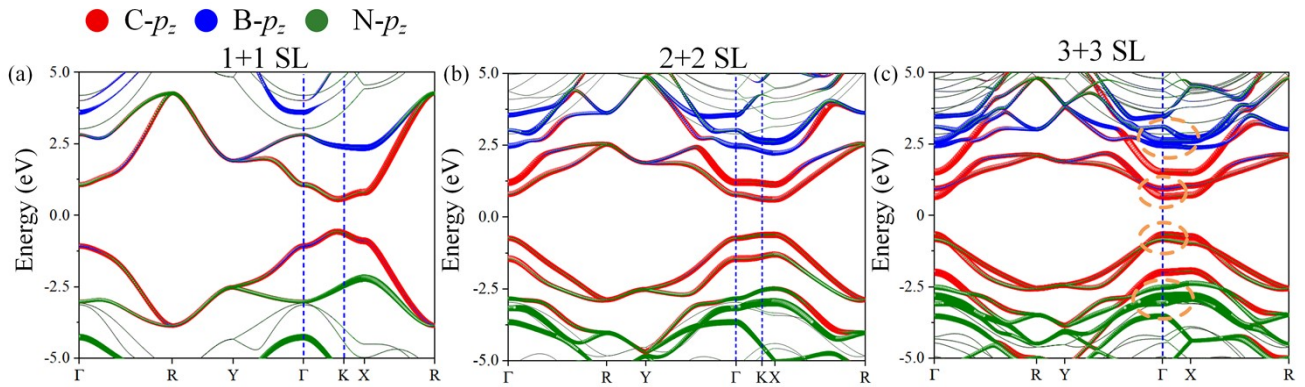

Figure S2 The orbital-resolved band structure of (a) 1+1, (b) 2+2, (c) 3+3 armchair SLs. Red, blue, and green spheres denote the C-, B-, and N- $p_z$  orbital contribution, with the sphere size corresponding to its weight. The orange circles highlight regions with high  $p_z$  orbital weight in the 3+3 SL.

The charge transfer at the 1D interface can be characterized by the charge density difference, as shown in Figure S3, where yellow and blue regions indicate electron gain and loss, respectively. Significant charge redistribution is observed across the interface in Figure S3, consistent with the electronegativity differences among C (2.55), B (2.04), and N (3.04) atoms. Specifically, for the C-N bonds at the interface, the higher electronegativity of N compared to C results in electron accumulation around N (yellow regions) and depletion around C (blue regions). Conversely, for the C-B bonds at the interface, the higher electronegativity of C relative to B causes electron accumulation near C and depletion near B. This charge transfer provides clear evidence of stable chemical bonding formation at the interface.

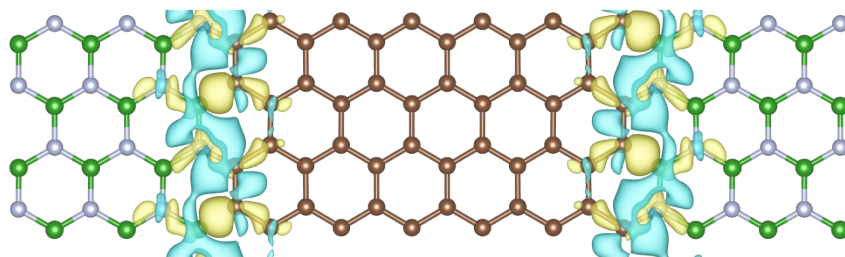

Figure S3. The charge density difference of 6+6 graphene/BN armchair SL.

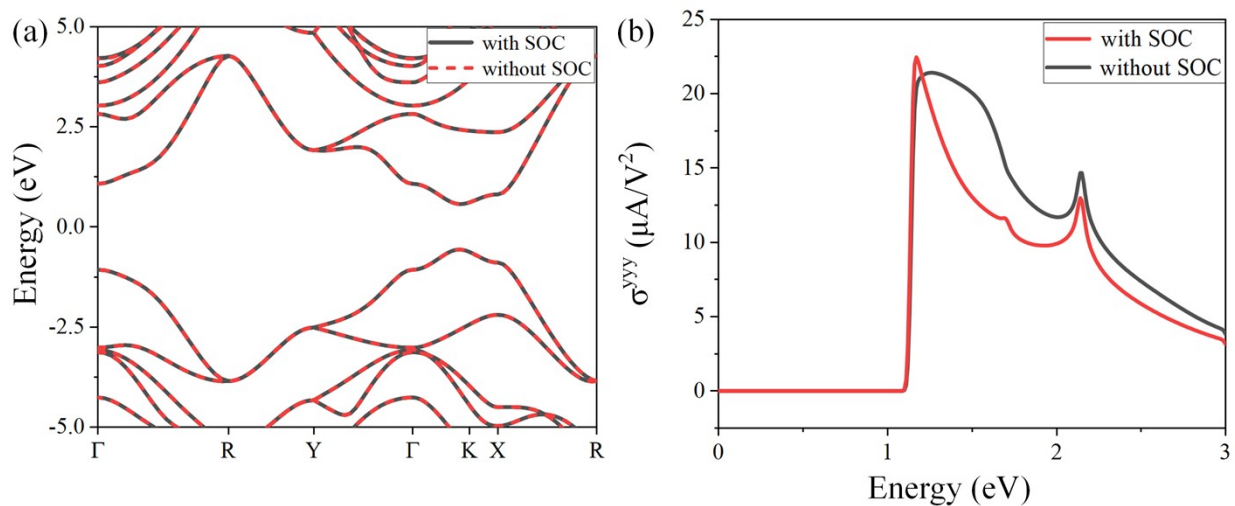

Figure S4 (a) The calculated energy band structure, and (b) the shift current of the 1+1 graphene/BN armchair SL with spin-orbit coupling (SOC) and without SOC.

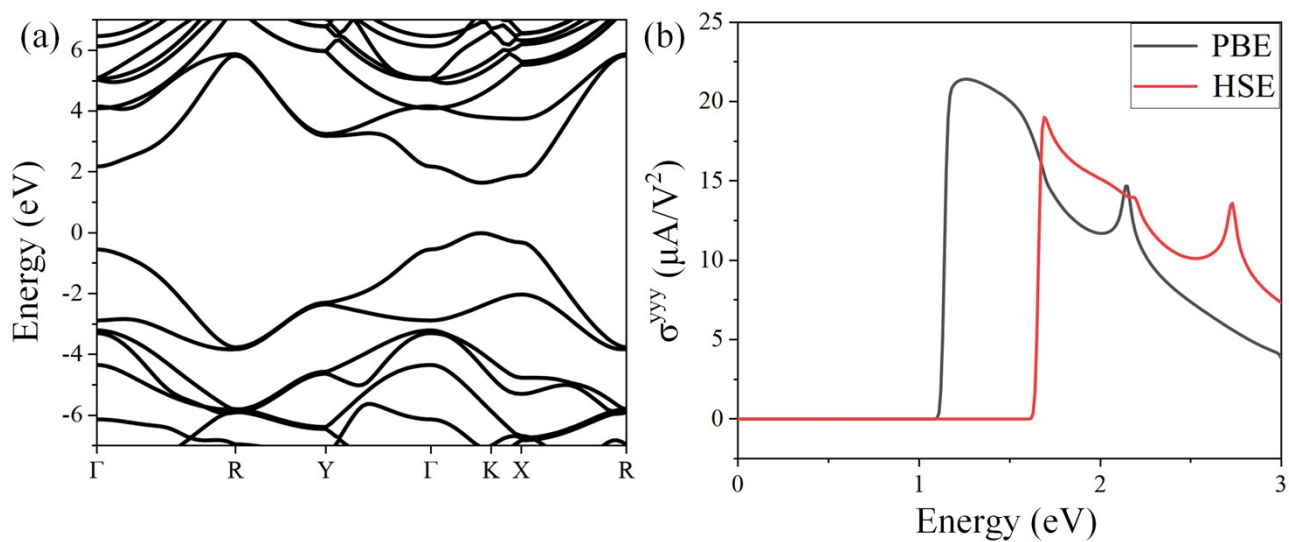

Figure S5 (a) The calculated energy band structure, and (b) the shift current of the 1+1 graphene/BN armchair SL, obtained using the HSE06 functional.

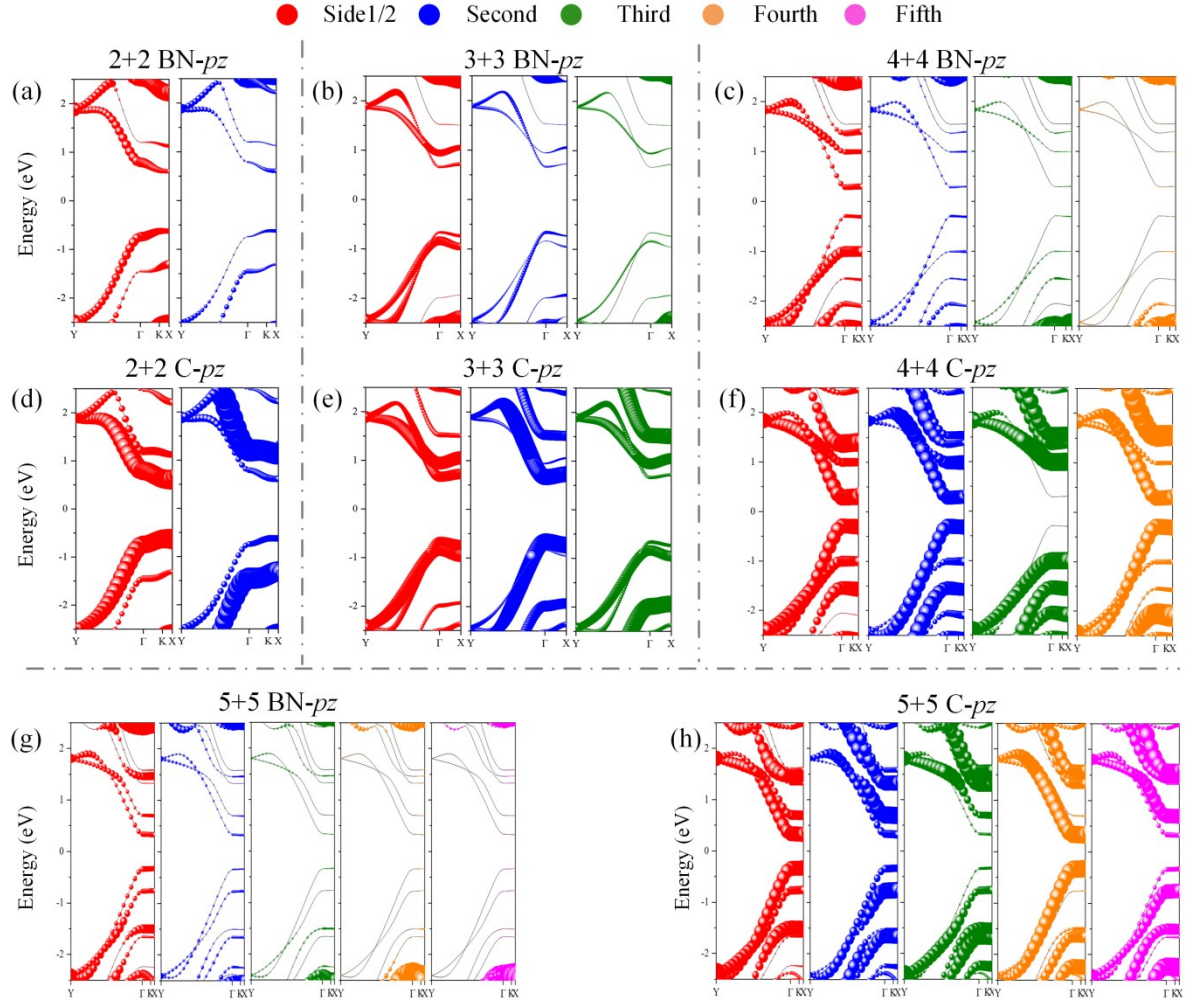

Figure S6 (a-h) The  $p_z$  orbital-resolved band structure of the graphene/BN armchair SLs with varying width ( $N=2-5$ ), with red, blue, green, orange, and magenta dotted lines representing the BN- $p_z$ , and C- $p_z$  orbitals of the 1-5 atomic row, respectively.

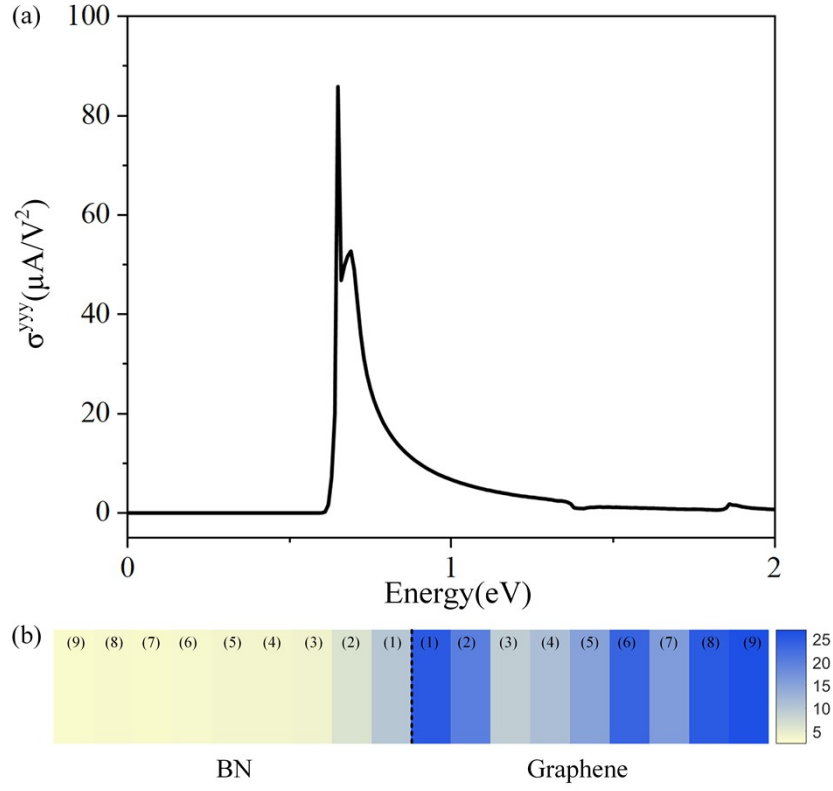

Figure S7 (a) The shift current conductance  $\sigma^{yyy}$  and (b) the heat map of  $\sigma^{yyy}$  contributed by each atomic rows in the 9+9 graphene/BN armchair SLs at the incident photon energy of 0.70 eV.

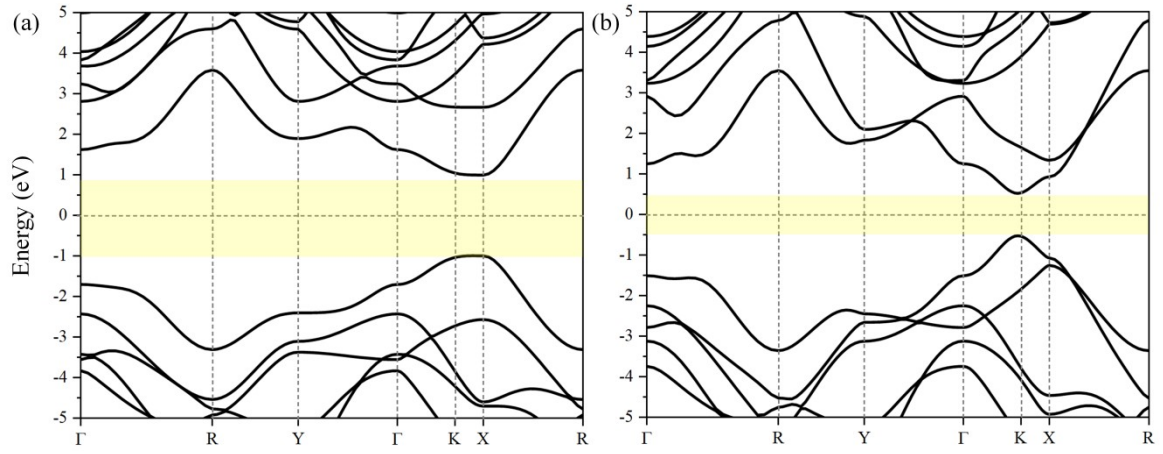

Figure S8 The calculated energy band of the 1+1 armchair (a)  $C_2B_3N_3$ , (b)  $C_6B_1N_1$  SLs.
